# Supplementary material for: Markers of MEK inhibitor resistance in low-grade serous ovarian cancer: EGFR is a potential therapeutic target
Source: Cancer Cell Int. 2019 Jan 8;19:10. doi: 10.1186/s12935-019-0725-1 (PMC6325847; doi:10.1186/s12935-019-0725-1)
Supplement: Supplementary file 5 — Additional file 5: Table S4. EGFR information on LGSC cell lines. [file 12935_2019_725_MOESM5_ESM.xlsx]

## Sheet: Sheet1
Table S4. EGFR Information on LGSC cell lines.
Sample name	MEKi drug response	EGFR WB expression	EGFR CNV status	Erlotinib IC50 (μM)
iOvCa241	Sensitive	Low	Normal	9.7
VOA-9164	Sensitive	Low	High Copy Gain	0.63 - 1.4
VOA-1312	Sensitive	Low	Allelic Imbalance	-
VOA-8862	Sensitive	Low	Allelic Imbalance, CN Gain	-
VOA-1056	Resistant	High	Normal	-
VOA-3993	Resistant	High	Normal	>20
VOA-3448	Resistant	High	CN Gain	-
VOA-3723	Resistant	High	Normal	~0.5
VOA-4627	Resistant	High	CN Gain	>20
VOA-4698	Resistant	High	Normal	-
VOA-6406	Resistant	High	Normal	>20
Based on WES analysis, no AA non-synonymous mutations affecting EGFR gene where detected in our LGSC cell lines.
(-) Not tested.
