# Supplementary material for: Markers of MEK inhibitor resistance in low-grade serous ovarian cancer: EGFR is a potential therapeutic target
Source: Cancer Cell Int. 2019 Jan 8;19:10. doi: 10.1186/s12935-019-0725-1 (PMC6325847; doi:10.1186/s12935-019-0725-1)
Supplement: Supplementary file 7 — Additional file 7: Table S5. Compusyn data from selumetinib/trametinib and erlotinib drug combinations in MEKi-re LGSC cell lines. [file 12935_2019_725_MOESM7_ESM.xlsx]

## Sheet: CompuSyn data
Table S5. Compusyn data from erlotinib and selumetinib/trametinib drug combinations in MEKi-Re LGSC cell lines.
Compusyn Data
Selumetinib + Erlotinib Combos in 4 MEKi-Re LGSC cell lines.
Results from IncuCyte, MTS and crystal violet experimets, performed in duplicate.
Drug effects: synergism (<1), additive effect (1), and antagonism (>1).
	VOA 6406				VOA 3723				VOA 4627				VOA 3993
Selumetinib + Erlotinib Combos	Incucyte	MTS	CV		Incucyte	MTS	CV		Incucyte	MTS	CV		Incucyte	MTS	CV
1.0uM Sel + Erlot 10µM	0.18828	0.00395	0.44427		2.58276	0.34673	0.04399		5.99388	0.69607	0.45912		102.05	1.35101	0.84714
1.0uM Sel + Erlot 5µM	0.09185	8.52e-08	0.14987		1.1886	0.31626	0.13289		3.88062	0.60563	0.45738		13.267	5.32559	0.48466
1.0uM Sel + Erlot 2.5µM	0.08633	3.37e-08	0.07556		0.65512	0.23522	0.11609		2.21286	0.53102	0.44184		1.46137	7.73326	0.33787
1.0uM Sel + Erlot 1.25µM	0.22517	6.69e-05	0.05696		0.41474	0.17354	0.09521		2.17077	0.37224	0.51078		3.02506	1.78771	0.34687
1.0uM Sel + Erlot 0.63µM	0.38108	0.01401	0.05087		0.23224	0.10072	0.04718		1.8432	0.1425	0.38287		3.24377	0.70082	0.15476
0.5uM Sel + Erlot 10µM	0.21971	0.00328	0.56712		2.79791	0.45747	0.06986		2.98407	0.70521	0.5922		168.374	0.88256	0.9026
0.5uM Sel + Erlot 5µM	0.0826	1.24e-08	0.16506		0.9702	0.35106	0.12288		1.71359	0.60189	0.62725		3.09481	1.57397	0.60348
0.5uM Sel + Erlot 2.5µM	0.04741	3.4e-10	0.08305		0.5685	0.22744	0.11493		1.24158	0.61444	0.54021		2.51456	0.91588	0.61351
0.5uM Sel + Erlot 1.25µM	0.08484	1.71e-07	0.05023		0.3113	0.20103	0.05805		2.0604	0.28274	0.53448		1.362	0.65419	1.249
0.5uM Sel + Erlot 0.63µM	0.11282	0.1585	0.03191		0.19375	0.09422	0.02214		2.62572	0.16767	0.35128		7.49953	0.14957	0.77151
	VOA 6406				VOA 3723				VOA 4627				VOA 3993
Trametinib + Erlotinib Combos	Incucyte	MTS*	CV		Incucyte	MTS	CV		Incucyte	MTS	CV		Incucyte	MTS	CV
100nM Tra + Erlot 10µM	34.8633		0.02997		3.17467	0.03298	1.2e-06		3.06416	0.02046	0.1878		0.48394	0.36926	0.64967
100nM Tra + Erlot 5µM	13.558		0.04547		2.44497	0.1678	0.14804		1.90777	0.02999	0.11422		0.63923	0.94843	0.44668
100nM Tra + Erlot 2.5µM	1.98578		0.02231		1.48094	0.2918	0.43258		1.80434	0.07662	0.07293		0.74765	1.06296	0.6192
100nM Tra + Erlot 1.25µM	2.23358		0.01262		1.12903	0.36007	0.71634		2.90652	0.14213	0.05323		0.48163	0.66013	0.23911
100nM Tra + Erlot 0.63µM	2.6949		0.01345		1.53458	0.31929	1.16971		1.66012	0.02782	0.01006		1.0832	1.14686	1.05492
50nm Tra + Erlot 10µM	19.9502		0.09003		3.53799	0.08256	0.02705		1.45964	0.06174	0.38657		0.67814	0.88836	0.99492
50nm Tra + Erlot 5µM	5.16534		0.06349		1.95427	0.28025	0.19204		1.39942	0.06204	0.26338		0.91112	1.20497	0.83628
50nm Tra + Erlot 2.5µM	4.3918		0.0379		1.11307	0.31105	0.4736		1.18519	0.02365	0.05517		1.23148	1.11603	5.37361
50nm Tra + Erlot 1.25µM	4.7526		0.02993		0.90753	0.42653	0.4624		0.93882	0.07109	9.72e+59		1.2676	1.0148	3.48507
50nm Tra + Erlot 0.63µM	3.2862		0.78497		1.64061	0.40906	0.71169		0.63119	0.02543	0.01439		1.25042	0.9449	1.85988
* Cannot calculate due to no dose effect from erlotinib treatments
Values have been reduced to three decimals, and redundant second tab was deleted.
